# Supplementary material for: TpBD/UiO-66-NH2 micro–mesoporous hybrid material as a stationary phase for open tubular capillary electrochromatography
Source: Royal Society of Chemistry journal article supplement (doi:10.1039/d4ra05097e), 2024-01-01
Supplement: d4ra05097e1.pdf [file d4ra05097e1.pdf]

## Supporting Information

### **TpBD/UiO-66-NH<sub>2</sub> micro-mesoporous hybrid material as a stationary phase of open tubular capillary electrochromatography**

*Lidi Gao<sup>1,2</sup>, Xinran Qu<sup>1</sup>, Shuang Meng<sup>1</sup>, Mo Chen<sup>1</sup>, Yuxin He<sup>1</sup>, Fuquan Zhao<sup>1</sup>,*

*Hongtao Chu<sup>1,2</sup>, Shili Qin<sup>1,2\*</sup> and Fenglong Jin<sup>3\*</sup>*

<sup>1</sup>College of Chemistry and Chemical Engineering, Qiqihar University, Qiqihar 161006, China;

<sup>2</sup>Heilongjiang Industrial Hemp Processing Technology Innovation Center, Qiqihar University, Qiqihar 161006, China;

<sup>3</sup>Technology Innovation Center of Industrial Hemp for State Market Regulation, Qiqihar University, Qiqihar 161006, China.

\*Correspondence: qinshili1103@163.com;

# 1. Experimental Methods:

## 1.1 Preparation and composition of ammonium acetate buffers

The ammonium acetate buffers are prepared by titrating equi-molar concentrations (20 mmol/L) of ammonium acetate, ammonia and acetic acid or adjusting with ammonia and acetic acid till a desired pH is reached.

## 1.2 Preparation of samples solutions

Firstly, 25.0 mg of each standards (Glu, Asp, Ser, Ala, Val, Thr, Ile, Leu, Met, Trp, Phe, Arg and His; MHB, EHB, PHB and BHB; Mnz, Cpl, Tet and Ctc; SM1, SDM, SM2, SMZ, SIZ and ST) were accurately weighed, and then the standards were dissolved in a small amount of methanol or acetone solution, and then diluted with ultrapure water (18.2 M $\Omega$ /cm) to 5.0 mL to obtain their stock solutions with a concentration of 5.0 mg/mL. The work mixed solutions were obtained by mixing the corresponding stock solution of 1.00 mL of each analyte.

## 1.3 Preparation of TpBD- and UiO-66-NH<sub>2</sub>-bonded OT-CEC column

TpBD- and UiO-66-NH<sub>2</sub>-bonded OT-CEC column preparation followed three steps process: (i) pretreatment of the capillary column, (ii) activation of aldehyde groups, (iii) modification of TpBD or UiO-66-NH<sub>2</sub>. The first and second steps are consistent with the preparation method of TpBD/UiO-66-NH<sub>2</sub>. For the immobilization of TpBD COF on the inner wall of the capillary column by TpBD-bonded OT-CEC column, the aldehyde-coated capillary was filled with a 1:1.5 molar ratio mixture of Tp (12.0 mg) and BD (16.0 mg) as the monomers, and kept for 12 h in a water bath at 80 °C with sealing at both ends<sup>[1]</sup>. The reaction principle of UiO-66-NH<sub>2</sub> bonded open tubular column is the same as that of TpBD bonded open tubular column. In order to fix UiO-66-NH<sub>2</sub> on the inner wall of the capillary column of UiO-66-NH<sub>2</sub>-bonded OT-CEC column, the aldehyde-coated capillary was filled with UiO-66-NH<sub>2</sub> (38.8 mg), and kept in a water bath at 80 °C for 24 h, both ends sealed. Both processes were repeated twice. The inner diameter, outer diameter and effective length of TpBD- and UiO-66-NH<sub>2</sub>-bonded OT-CEC columns were the same as those of TpBD/UiO-66-NH<sub>2</sub> bonded OT-CEC column.

## 2. Supporting Figures:

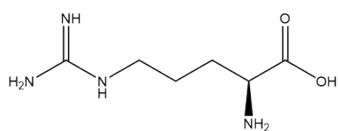

Arginine (Arg)

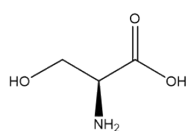

Serine (Ser)

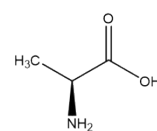

Alanine (Ala)

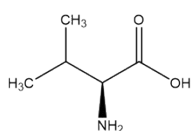

Valine (Val)

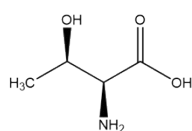

Threonine (Thr)

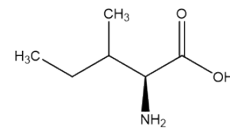

Isoleucine (Ile)

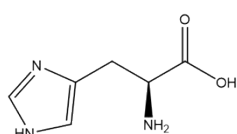

Histidine (His)

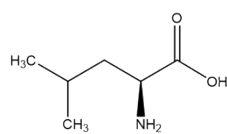

Leucine (Leu)

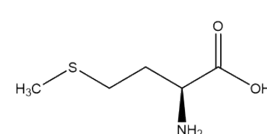

Methionine (Met)

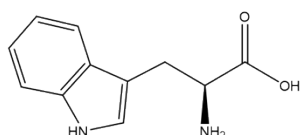

Tryptophan (Trp)

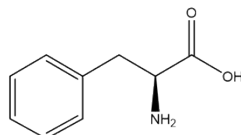

Phenylalanine (Phe)

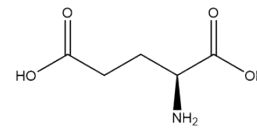

Glutamic acid (Glu)

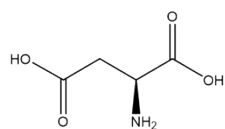

Aspartic acid (Asp)

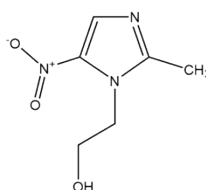

Metronidazole (Mnz)

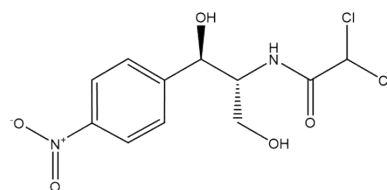

Chloramphenicol (Cpl)

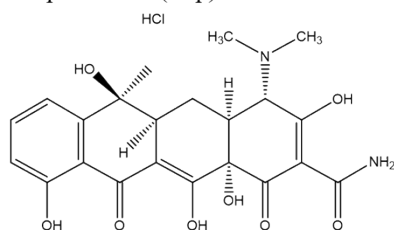

Tetracycline hydrochloride (Tet)

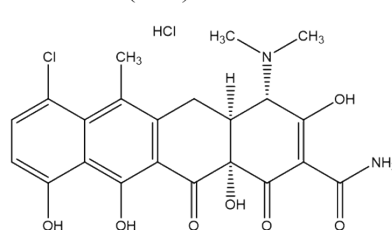

Chlortetracycline hydrochloride (Ctc)

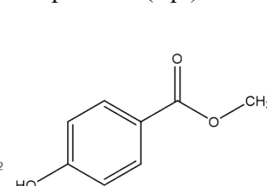

Methyl 4-hydroxybenzoate (MHB)

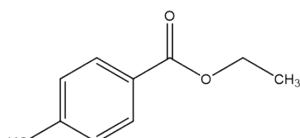

Ethyl 4-hydroxybenzoate (EHB)

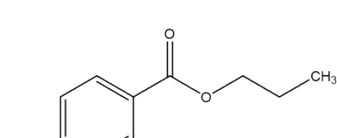

Propyl 4-hydroxybenzoate (PHB)

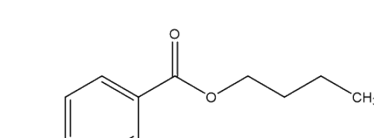

Butyl 4-hydroxybenzoate (BHB)

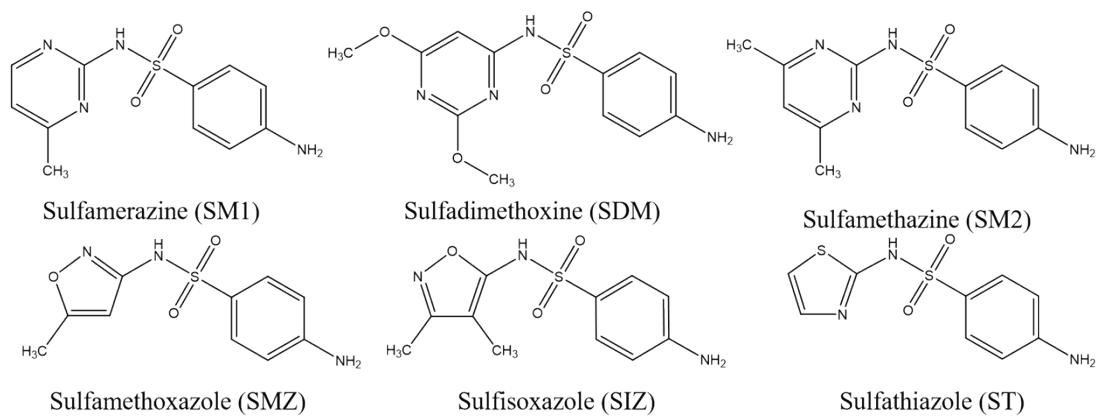

**Fig. S1** Chemical structures of the analytes investigated

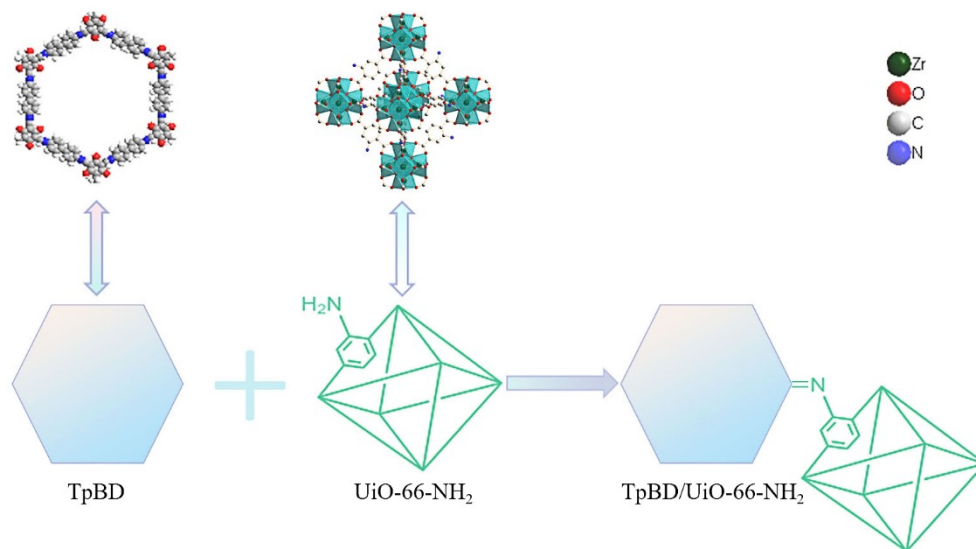

**Fig. S2** Schematic illustration of TpBD/Uio-66-NH<sub>2</sub> synthesis

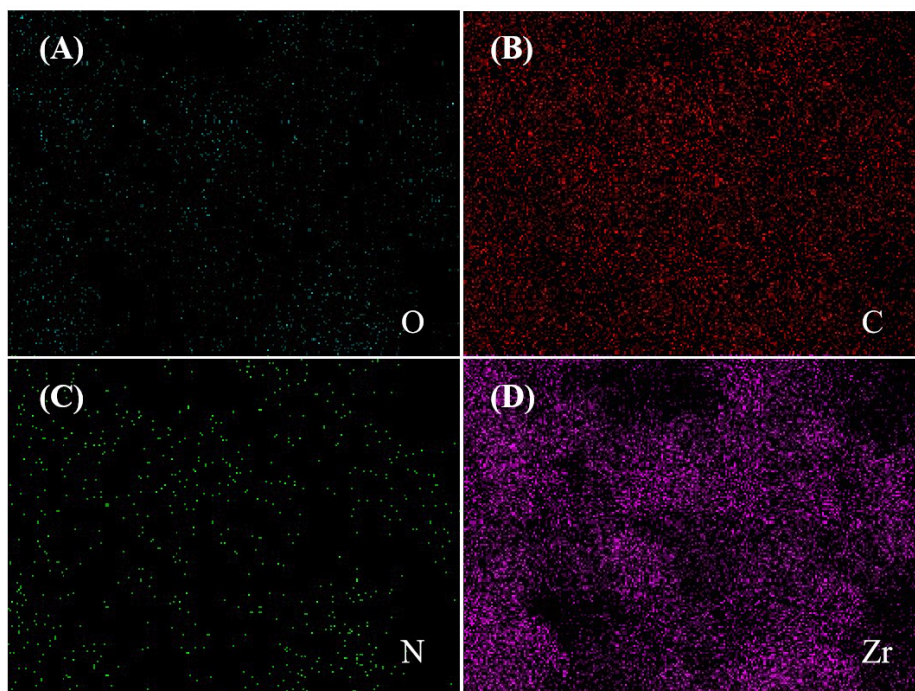

**Fig. S3** EDS mapping (A-D) of TpBD/UiO-66-NH<sub>2</sub>.

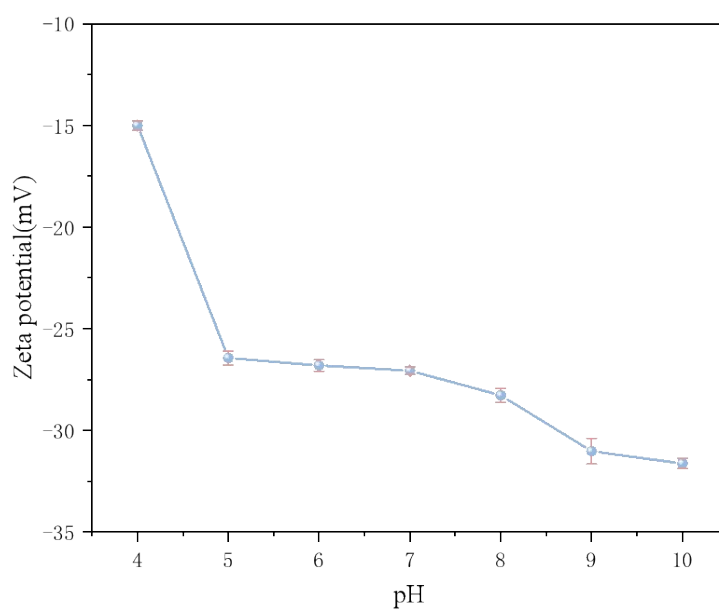

**Fig. S4** Zeta potential curve of TpBD/UiO-66-NH<sub>2</sub>. (Experimental conditions: 0.2 mg/mL of TpBD/UiO-66-NH<sub>2</sub>, 20 mmol/L ammonium acetate buffer, 25°C.) (n=3)

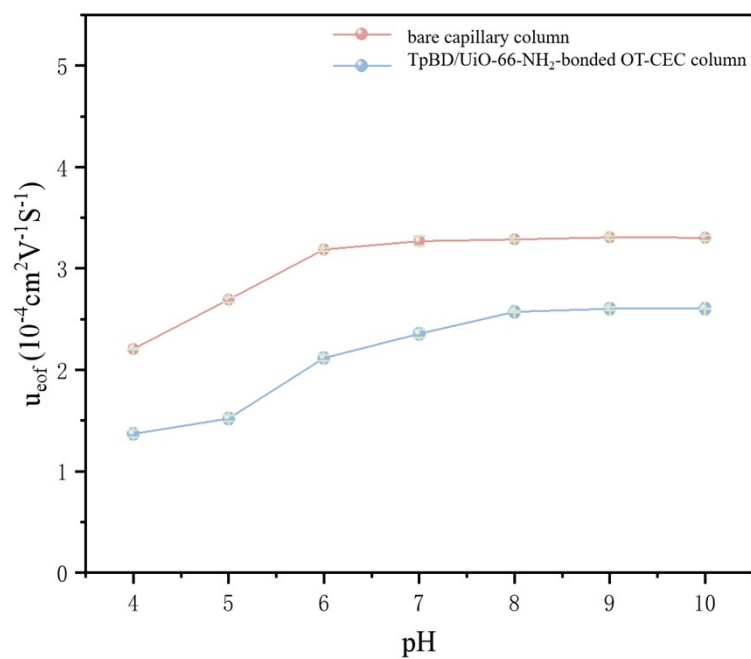

**Fig. S5** Effect of buffer pH on EOF. (Experimental conditions: sample, 1.0 mg/mL thiourea; 20 mmol/L of ammonium acetate buffer solution; operating voltage, 15 kV.) (n=3)

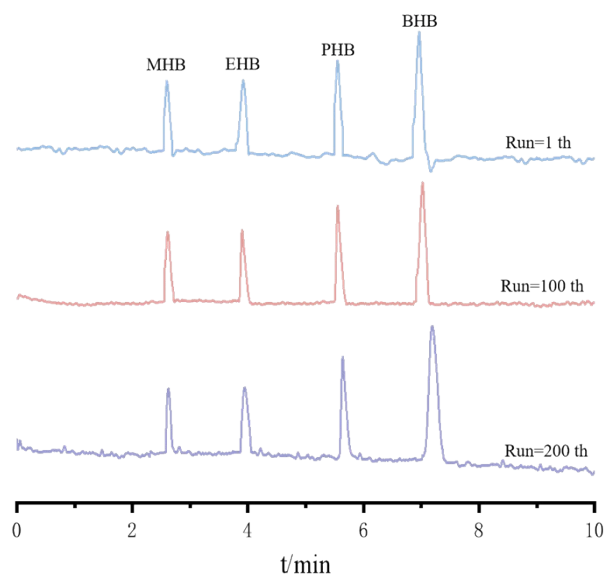

**Fig. S6** Separation chromatogram of MHB, EHB, PHB and BHB with different runs. (Experimental conditions: sample, 5 mg/mL the mixture of MHB, EHB, PHB and BHB; 20 mmol/L of ammonium acetate buffer, pH=9; operating voltage, 15 kV; detection wavelength, 254 nm.)

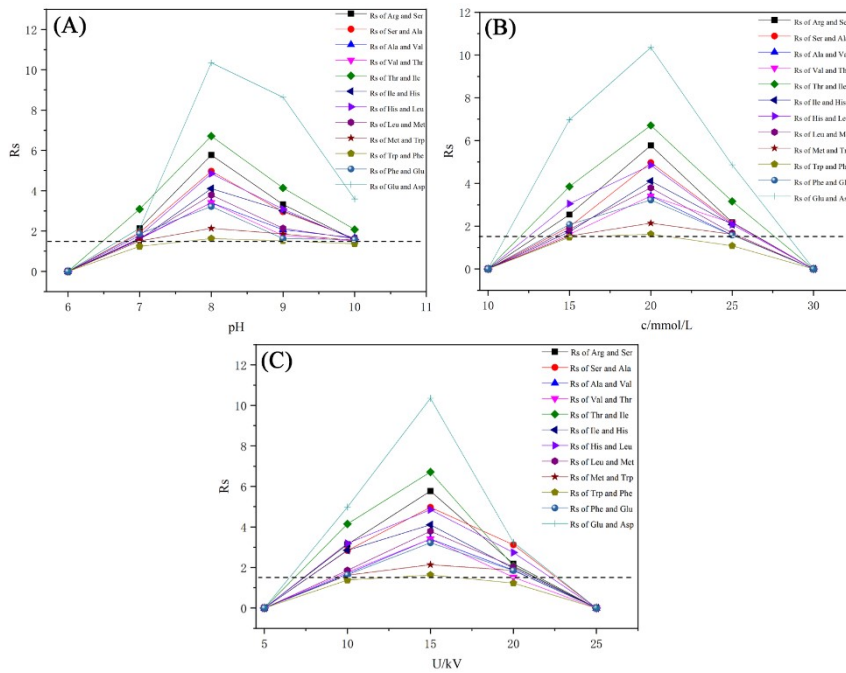

**Fig. S7** Effects of buffer solution pH under the conditions of 20 mmol/L of ammonium acetate buffer and operating voltage of 15 kV (A), buffer concentration (pH=8) at operating voltage of 15 kV (B) and separation voltage with 20 mmol/L of ammonium acetate buffer (pH=8) (C) on resolution of 13 amino acids on TpBD/UiO-66-NH<sub>2</sub>-bonded OT-CEC column. (Detection wavelength, 214 nm. Rs of all the analytes under the different experimental conditions was the average of three determinations (n=3).)

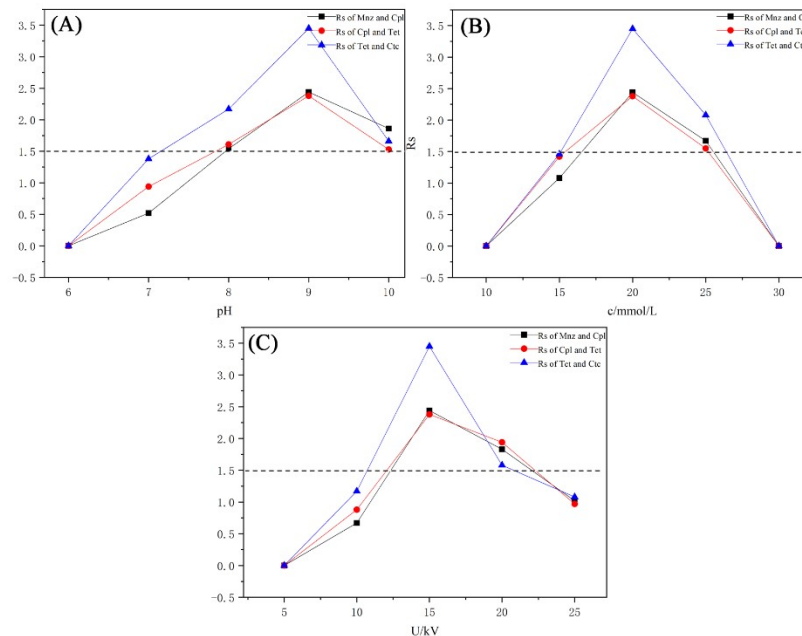

**Fig. S8** Effects of buffer solution pH under the conditions of 20 mmol/L of ammonium acetate buffer and operating voltage of 15 kV (A), concentration (pH=9) at operating voltage of 15 kV (B) and separation voltage with 20 mmol/L of ammonium acetate buffer (pH=9) (C) on resolution of four antibiotics on TpBD/UiO-66-NH<sub>2</sub>-bonded OT-CEC column (Detection wavelength, 270 nm. (n=3)).

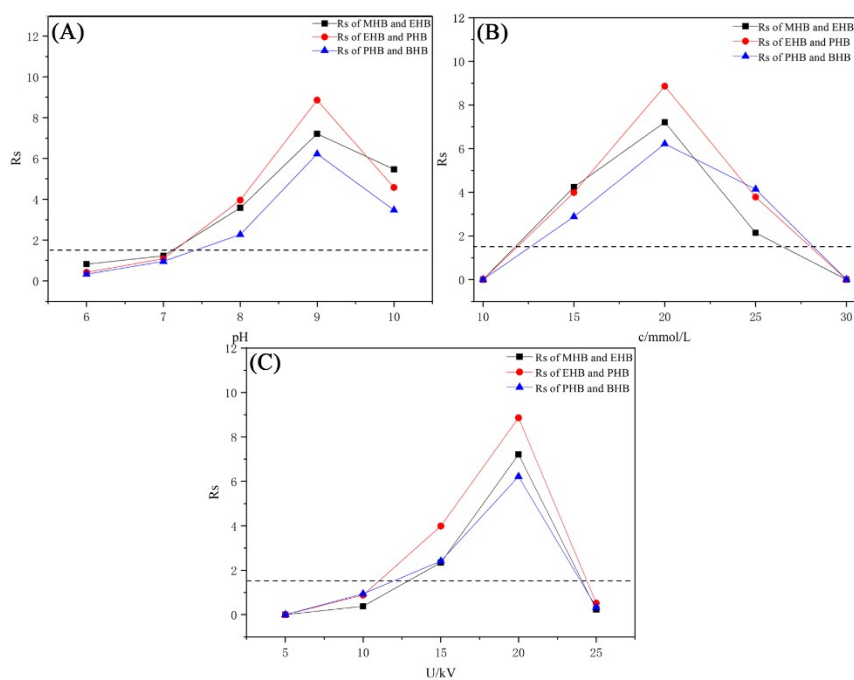

**Fig. S9** Effects of buffer solution pH under the conditions of 20 mmol/L of ammonium acetate buffer and operating voltage of 20 kV (A), concentration (pH=9) at operating voltage of 20 kV (B) and separation voltage with 20 mmol/L of ammonium acetate buffer (pH=9) (C) on resolution of four preservatives on TpBD/UiO-66-NH<sub>2</sub>-bonded OT-CEC column (Detection wavelength, 270 nm. (n=3)).

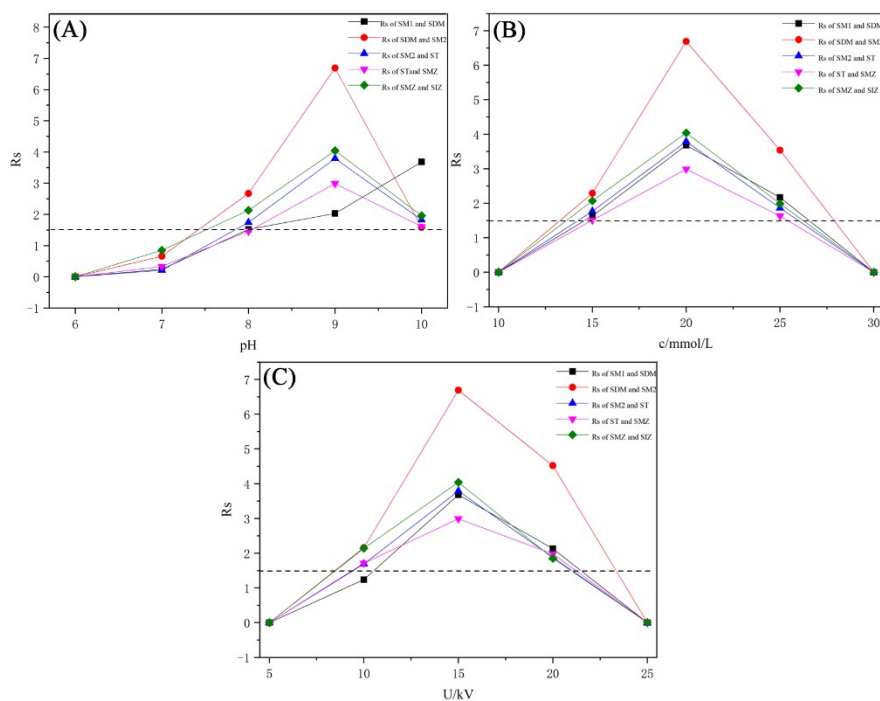

**Fig. S10** Effects of buffer solution pH under the conditions of 20 mmol/L of ammonium acetate buffer and operating voltage of 15 kV (A), concentration (pH=9) at operating voltage of 15 kV (B) and separation voltage with 20 mmol/L of ammonium acetate buffer (pH=9) (C) on resolution of six sulfonamides on TpBD/UiO-66-NH<sub>2</sub>-bonded OT-CEC column. (Detection wavelength, 254 nm.



(n=3).

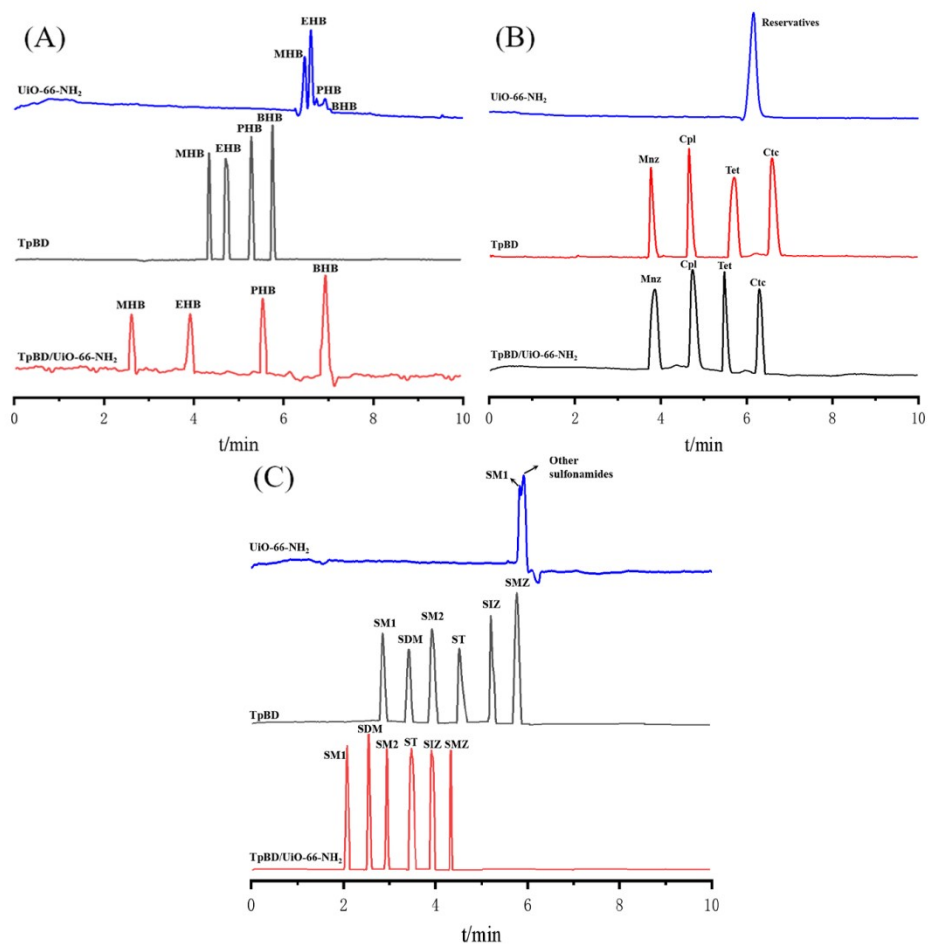

**Fig. S11** Separation diagrams of four antibiotics (A), four preservatives (B) and six sulfonamides (C) on three open-tubular columns. (Experimental conditions: 20 mmol/L of ammonium acetate buffer; pH=9; operating voltage, 15 kV; detection wavelength, sulfonamides at 254 nm, antibiotics and preservatives at 270 nm.)

### 3. Supporting Tables:

**Table S1** XPS data of TpBD/UiO-66-NH<sub>2</sub> hybrid material

| Elements | Peak BE | Atomic% |
|----------|---------|---------|
| C1s      | 283.48  | 60.45   |
| O1s      | 530.28  | 29.03   |
| N1s      | 182.19  | 4.81    |
| Zr3d     | 398.34  | 5.72    |

**Table S2** Pore structure parameters of UiO-66-NH<sub>2</sub>, TpBD, TpBD/UiO-66-NH<sub>2</sub>

| Samples                                | S <sub>BET</sub> (m <sup>2</sup> /g) | Pore volume (cm <sup>3</sup> /g) | Pore size (nm) |
|----------------------------------------|--------------------------------------|----------------------------------|----------------|
| UiO-66-NH <sub>2</sub> <sup>[32]</sup> | 897.78                               | 0.31                             | 1.232          |
| TpBD <sup>[33]</sup>                   | 524.38                               | 0.84                             | 3.50-7.80      |
| TpBD/UiO-66-NH <sub>2</sub>            | 340.04                               | 0.21                             | 1.18-2.65      |

**Table S3** Reproducibility and stability of the TpBD/UiO-66-NH<sub>2</sub> bonded OT-CEC column.

| Types and numbers (n)  | RSDs (%) of migration time |      |      |      | RSDs (%) of resolution |         |         |
|------------------------|----------------------------|------|------|------|------------------------|---------|---------|
|                        | MHB                        | EHB  | PHB  | BHB  | MHB-EHB                | EHB-PHB | PHB-BHB |
| Run to run (n=9)       | 1.24                       | 1.17 | 1.62 | 1.55 | 1.85                   | 1.79    | 1.94    |
| Day to day (n=9)       | 1.63                       | 1.74 | 1.71 | 1.83 | 2.14                   | 1.86    | 1.99    |
| Column to column (n=3) | 2.99                       | 3.12 | 3.20 | 3.17 | 4.01                   | 3.23    | 3.94    |
| Runs (n=200)           | 3.54                       | 3.46 | 3.93 | 3.69 | 3.77                   | 3.72    | 4.31    |

**Table S4** Separation results of the analytes by three types of bonded-OT column

| Stationary phase            | Analytes | Migration time<br>(t /min) | Column efficiency<br>(plates/m) | Rs   | $\alpha$ |
|-----------------------------|----------|----------------------------|---------------------------------|------|----------|
| TpBD                        | MHB      | 4.34                       | 43460                           | -    | -        |
|                             | EHB      | 4.71                       | 33023                           | 2.55 | 1.09     |
|                             | PHB      | 5.29                       | 14355                           | 3.79 | 1.12     |
|                             | BHB      | 5.77                       | 21785                           | 3.60 | 1.09     |
|                             | Mnz      | 3.76                       | 8155                            | -    | -        |
|                             | Cpl      | 4.65                       | 11979                           | 3.52 | 1.24     |
|                             | Tet      | 5.71                       | 5607                            | 3.68 | 1.23     |
|                             | Ctc      | 6.61                       | 9110                            | 2.58 | 1.16     |
|                             | SM1      | 2.85                       | 4500                            | -    | -        |
|                             | SDM      | 3.41                       | 6423                            | 3.08 | 1.20     |
|                             | SM2      | 3.93                       | 5304                            | 2.45 | 1.15     |
|                             | ST       | 4.52                       | 8412                            | 2.51 | 1.15     |
|                             | SIZ      | 5.21                       | 16317                           | 3.36 | 1.15     |
|                             | SMZ      | 5.77                       | 9823                            | 2.79 | 1.11     |
| UiO-66-NH <sub>2</sub>      | MHB      | 6.47                       | 30636                           | -    | -        |
|                             | EHB      | 6.61                       | 37820                           | 0.74 | 1.02     |
|                             | PHB      | 6.73                       | 17400                           | 1.05 | 1.02     |
|                             | BHB      | 6.93                       | 6033                            | 1.32 | 1.03     |
|                             | Mnz      |                            |                                 |      |          |
|                             | Cpl      | 6.17                       | 6809                            | -    | -        |
|                             | Tet      |                            |                                 |      |          |
|                             | Ctc      |                            |                                 |      |          |
|                             | SM1      | 5.89                       | 7143                            | -    | -        |
|                             | SDM      |                            |                                 |      |          |
|                             | SM2      |                            |                                 |      |          |
|                             | ST       | 5.92                       | 7394                            | 0.14 | 1.00     |
|                             | SIZ      |                            |                                 |      |          |
|                             | SMZ      |                            |                                 |      |          |
| TpBD/UiO-66-NH <sub>2</sub> | MHB      | 2.59                       | 3315                            | -    | -        |
|                             | EHB      | 2.91                       | 3682                            | 7.21 | 1.52     |
|                             | PHB      | 5.55                       | 14888                           | 8.86 | 1.41     |
|                             | BHB      | 6.97                       | 16672                           | 6.22 | 1.25     |
|                             | Mnz      | 3.85                       | 2651                            | -    | -        |
|                             | Cpl      | 4.73                       | 5295                            | 2.44 | 1.32     |
|                             | Tet      | 5.48                       | 20540                           | 2.38 | 1.16     |
|                             | Ctc      | 6.29                       | 12968                           | 2.45 | 1.15     |
|                             | SM1      | 2.07                       | 4858                            | -    | -        |
|                             | SDM      | 2.55                       | 9998                            | 3.68 | 1.23     |
|                             | SM2      | 2.95                       | 30092                           | 6.69 | 1.16     |
|                             | ST       | 3.47                       | 5833                            | 3.79 | 1.18     |
|                             | SIZ      | 3.02                       | 8866                            | 2.99 | 1.12     |
|                             | SMZ      | 4.34                       | 64903                           | 4.04 | 1.11     |
